# Supplementary material for: Characterization of Phosphorylation Status and Kinase Activity of Src Family Kinases Expressed in Cell-Based and Cell-Free Protein Expression Systems
Source: MDPI journal article supplement (doi:10.3390/biom11101448), 2021-10-02
Supplement: s1 [file s1]

## Supplementary Information S1

Alignment of eight **SKF** sequences by ClustalW analysis. Phosphorylation site by CSK and autophosphorylation site in kinase domain are shown in bold.

|                  |                                                     |     |
|------------------|-----------------------------------------------------|-----|
| P12931 SRC_HUMAN | -----MGSNKS KP-KDASQRRRSLEPAENVHGAG                 | 28  |
| P07947 YES_HUMAN | -----MGCIKSKENKSPAICYRPENTPEPVSTSV                  | 29  |
| P09769 FGR_HUMAN | -----MGCVFCKKLEPVATAKEDAGLEGDFRSYG                  | 29  |
| P06241 FYN_HUMAN | -----MGCVCQCKDEATKLTEERDGS LNQSSGY-                 | 28  |
| P08631 HCK_HUMAN | MGGRSSCEDPGCPRDEERAPRMGCMKSFKLQVGGN--TFSKTETSASPHC  | 48  |
| P07948 LYN_HUMAN | -----MGCIKSKGKDSLSDGVDLKTQPVNRTER                   | 29  |
| P06239 LCK_HUMAN | -----MGC GCS----SHPEDDWMENIDVCENCHY                 | 25  |
| P51451 BLK_HUMAN | -----MGLVSSK---KPDKEKPIKEKDKGQWSPL                  | 26  |
|                  |                                                     |     |
| P12931 SRC_HUMAN | G--GAFPASQTSPKSPASADGHRG--PSAAFAPAAAEF--KLFGGFNSSDT | 72  |
| P07947 YES_HUMAN | SHYGAEPTTVSPCPSSSAKGTAVNFSSLSMTPFGGSSGVTFFGGASSSFS  | 79  |
| P09769 FGR_HUMAN | A---ADHYGPDPT-KARPASSFAHIPNYSNFSSQ-----AINPGFLDS--  | 68  |
| P06241 FYN_HUMAN | -----RYGTDPTPQHYPSTFGVTSIPNYNFHAAGGQGLTVFGGVNSSSH   | 72  |
| P08631 HCK_HUMAN | P----VYVPDPTSTIKPGPNSH-----NSNTPG                   | 72  |
| P07948 LYN_HUMAN | T----IYVRDPTSNKQRPVPE-----SQLLP                     | 53  |
| P06239 LCK_HUMAN | P----IVPLDGKGTLLIRNGSE-----VRDPLV                   | 49  |
| P51451 BLK_HUMAN | K----VSAQDKDAPPLPPLVVF-----NHLTPP                   | 50  |
|                  |                                                     |     |
| P12931 SRC_HUMAN | VTSPQRAGPLAGGVTTFVALYDYESRTETDLSFKKGERLQIVNTEGDWW   | 122 |
| P07947 YES_HUMAN | VVPSSYPAGLTGGVTIFVALYDYEARTEDLSFKKGERFQIINNTEGDWW   | 129 |
| P09769 FGR_HUMAN | -GTIRGVSGIG--VTLFIALYDYEARTEDDLTFTKGKGFHILNTEGDWW   | 115 |
| P06241 FYN_HUMAN | TGTLRTRGGTG--VTLFVALYDYEARTEDDLSFKKGERFQILNSSEGDWW  | 120 |
| P08631 HCK_HUMAN | ----IREAGS--EDIIVVALYDYEAIHHEDLSFQKGDQMVVLEES-GEWW  | 115 |
| P07948 LYN_HUMAN | QRFQTKDPEE--QGDIVVALYPYDGIHPDDLSTFKKGEKMKVLEEH-GEWW | 100 |
| P06239 LCK_HUMAN | TYEGSNPPASPLQDNLVIALHSYEPSHDGDLGFKEGQRLRILEQS-GEWW  | 98  |
| P51451 BLK_HUMAN | PPDEHLEDK---HFVVALYDYTAMNDRDLQMLKGEKLQVLKGT-GDWW    | 95  |
|                  |                                                     |     |
| P12931 SRC_HUMAN | LAHSLSTGQTGYIPSNYVAPSDSIQAEWYFGKITRRESERLLLNAENPR   | 172 |
| P07947 YES_HUMAN | EARSIAATGKNGYIPSNYVAPADSIQAEWYFGKMGKDAERLLLNPQNQR   | 179 |
| P09769 FGR_HUMAN | EARSLSSGKTGCIPSNYVAPVDSIQAEWYFGKIGRKDAERQLLSPGNPQ   | 165 |
| P06241 FYN_HUMAN | EARSLTTGETGYIPSNYVAPVDSIQAEWYFGKLRKDAERQLLSFGNPR    | 170 |
| P08631 HCK_HUMAN | KARSLATRKEGYIPSNYVARVDSLETEEWFFKGISRKDAERQLLAPGNML  | 165 |
| P07948 LYN_HUMAN | KAKSLLTKEGFIIPSNYVAKLNTLETEEWFFKIDTRKDAERQLLAPGNSA  | 150 |
| P06239 LCK_HUMAN | KAQSLTTGQEGFIPNFVAKANSLEPEPWFKNLSRKDAERQLLAPGNTH    | 148 |
| P51451 BLK_HUMAN | LARSLVTGREGYVPSNFVARVESLEMERWFFRSQGRKEAERQLLAPINKA  | 145 |
|                  |                                                     |     |
| P12931 SRC_HUMAN | GTFLVRESETTKGAYCLSVSDFDNAKGLNVKHYKIRKLDSGGFYITSRTQ  | 222 |
| P07947 YES_HUMAN | GIFLVRESETTKGAYSLIRDWDEIRGDNVHYKIRKLDNGGGYITTRAQ    | 229 |
| P09769 FGR_HUMAN | GAFLIRESSETTKGAYSLIRDWQTRGDHVKHYKIRKLDMGGGYITTRVQ   | 215 |
| P06241 FYN_HUMAN | GTFLIRESSETTKGAYSLIRDWDMDKGDHVKHYKIRKLDNGGGYITTRAQ  | 220 |
| P08631 HCK_HUMAN | GSFMIRDSETTKGSYSLVRDYPDPRQDQTVKHYKIRKLDNGGGYISPRST  | 215 |
| P07948 LYN_HUMAN | GAFLIRESSETLKGFSLSVRDFDPVHGDVIKHYKIRKLDNGGGYISPRIT  | 200 |
| P06239 LCK_HUMAN | GSFLIRESESTAGSFSLSVRDFDQNGQEVVHYKIRKLDNGGGYISPRIT   | 198 |
| P51451 BLK_HUMAN | GSFLIRESETNKGAFSLVKDVT-TQGELIKHYKIRCLDEGGYISPRIT    | 194 |
|                  |                                                     |     |
| P12931 SRC_HUMAN | FNSLQQLVAYYSKHADGLCHRLTTVCPTSKPQTQGL---AKDAWEIPRES  | 269 |
| P07947 YES_HUMAN | FDTLQKLVKHYTEHADGLCHRLTTVCPTVKPQTQGL---AKDAWEIPRES  | 276 |
| P09769 FGR_HUMAN | FNSVQELVQHYMEVNDGLCNLLIAPCTIMKPQTGL---AKDAWEISRSS   | 262 |
| P06241 FYN_HUMAN | FETLQQLVQHYSERAGLCCRLVVPCHKGMPRLTDLVSKTKDVWEIPRES   | 270 |
| P08631 HCK_HUMAN | FSTLQELVDHYKKGNDGLCQKLSVPCMSKPKQKPWE---KDAWEIPRES   | 261 |
| P07948 LYN_HUMAN | FPCISDMIKHYQKQADGLCRRLEKACISPKPKQKPDW---KDAWEIPRES  | 246 |
| P06239 LCK_HUMAN | FPGLHELVRHYTNASDGLCTRLSRPCQTQKPKQKPDW---EDEWEVPRET  | 244 |
| P51451 BLK_HUMAN | FPSLQALVQHYSKKGDGLCQRLTLPCVRPAPQNPWA---QDEWEIPRQS   | 240 |

|                  |                                                            |     |                                     |
|------------------|------------------------------------------------------------|-----|-------------------------------------|
| P12931 SRC_HUMAN | LRLEVKLGGQCFGEVWMGTWNGTTRVAIKTLKPGTMSPEAFLEAEQVMKK         | 319 |                                     |
| P07947 YES_HUMAN | LRLEVKLGGQCFGEVWMGTWNGTTKVAIKTLKPGTMMPEAFLEAEQIMKK         | 326 |                                     |
| P09769 FGR_HUMAN | ITLEERRLGTGCFGDVWLGTWNGSTKVAVKTLKPGTMSPKAFLEAEQVMKL        | 312 |                                     |
| P06241 FYN_HUMAN | LQLIKRLNGQCFGEVWMGTWNGNTKVAIKTLKPGTMSPEAFLEAEQIMKK         | 320 |                                     |
| P08631 HCK_HUMAN | LKLEKKLGAGQCFGEVWMATYNNKHTKVAVKTMKPGSMSVEAFLEAEANVMKT      | 311 |                                     |
| P07948 LYN_HUMAN | IKLVKRLGAGQCFGEVWMGYNNSTKVAVKTLKPGTMSVQAFLEAEANLMT         | 296 |                                     |
| P06239 LCK_HUMAN | LKLVRLGAGQCFGEVWMGYNGHTKVAVKSLKQGSMSPDFALEAEANLMKQ         | 294 |                                     |
| P51451 BLK_HUMAN | LRLVRKLGSQCFGEVWMGYKNNMKVAIKTLKEGTMSPEAFLEAEANVMA          | 290 |                                     |
|                  |                                                            |     |                                     |
| P12931 SRC_HUMAN | LRHEKLVQLYAVVSE-EPIYIVTEYMSKGSLLDFLKGETGKYLRPLQLVD         | 368 |                                     |
| P07947 YES_HUMAN | LRHDKLVPLYAVVSE-EPIYIVTEFMSKGSLLDFLKEGDKYLRPLQLVD          | 375 |                                     |
| P09769 FGR_HUMAN | LRHDKLVQLYAVVSE-EPIYIVTEFMCHGSLLDFLKNPEGQDLRLPLQLVD        | 361 |                                     |
| P06241 FYN_HUMAN | LKHKLVQLYAVVSE-EPIYIVTEYMNKGSLLDFLKDEGRALKLPNLVD           | 369 |                                     |
| P08631 HCK_HUMAN | LQHDKLVKLHAVVTK-EPIYIITEFMAKGSLLDFLKSDEGSKQPLPKLID         | 360 |                                     |
| P07948 LYN_HUMAN | LQHDKLVRLYAVVTREPIYIITEYMAKGSLLDFLKSDEGGKVLLPKLID          | 346 |                                     |
| P06239 LCK_HUMAN | LQHQRVRLYAVVTQ-EPIYIITEYMENGLVDFLKTSGIKLTINKLLD            | 343 |                                     |
| P51451 BLK_HUMAN | LQHERLVRLYAVVTK-EPIYIVTEYMARGCLLDLFLKTDEGSRLSLPLID         | 339 |                                     |
|                  |                                                            |     |                                     |
| P12931 SRC_HUMAN | MAAQIASGMAYVERMNYVHRDLRAANILVGENLVCKVADFGLARLIEDNE         | 418 |                                     |
| P07947 YES_HUMAN | MAAQIADGMAYIERMNYIHRDLRAANILVGENLVCKIADFGLARLIEDNE         | 425 |                                     |
| P09769 FGR_HUMAN | MAAQVAEGMAYMERMNYIHRDLRAANILVGERLACKIADFGLARLIKDE          | 411 |                                     |
| P06241 FYN_HUMAN | MAAQVAAGMAYIERMNYIHRDLRSANILVGNGLICKIADFGLARLIEDNE         | 419 |                                     |
| P08631 HCK_HUMAN | FSAQIAEGMAFIEQRNYIHRDLRAANILVSASLVCKIADFGLARVIEDNE         | 410 |                                     |
| P07948 LYN_HUMAN | FSAQIAEGMAYIERKNYIHRDLRAANLVSESLMCKIADFGLARVIEDNE          | 396 |                                     |
| P06239 LCK_HUMAN | MAAQIAEGMAFIEERNYIHRDLRAANILVSDTLSCKIADFGLARLIEDNE         | 393 |                                     |
| P51451 BLK_HUMAN | MSAQIAEGMAYIERMNSIHRDLRAANILVSEALCCKIADFGLARIIDS-E         | 388 |                                     |
|                  |                                                            |     |                                     |
| P12931 SRC_HUMAN | <u>Y</u> TARQGAQKFIKWTAPEAALYGRFTIKSDVWSFGILLTELTTKGRVPYPG | 468 | <b>Y419 (autophosphorylation)</b>   |
| P07947 YES_HUMAN | <u>Y</u> TARQGAQKFIKWTAPEAALYGRFTIKSDVWSFGILQTELVTKGRVPYPG | 475 | <b>Y426 (autophosphorylation)</b>   |
| P09769 FGR_HUMAN | <u>Y</u> NPQQGSFKFIKWTAPEAALFGRFTIKSDVWSFGILLTELITKGRIPYPG | 461 | <b>Y412 (autophosphorylation)</b>   |
| P06241 FYN_HUMAN | <u>Y</u> TARQGAQKFIKWTAPEAALYGRFTIKSDVWSFGILLTELVTKGRVPYPG | 469 | <b>Y420 (autophosphorylation)</b>   |
| P08631 HCK_HUMAN | <u>Y</u> TAREGAQKFIKWTAPEAINFGSFTIKSDVWSFGILLMEIVTYGRIPYPG | 460 | <b>Y411 (autophosphorylation)</b>   |
| P07948 LYN_HUMAN | <u>Y</u> TAREGAQKFIKWTAPEAINFGCFTIKSDVWSFGILLYEIVTYGKIPYPG | 446 | <b>Y397 (autophosphorylation)</b>   |
| P06239 LCK_HUMAN | <u>Y</u> TAREGAQKFIKWTAPEAINYGTFTIKSDVWSFGILLTEIVTHGRIPYPG | 443 | <b>Y394 (autophosphorylation)</b>   |
| P51451 BLK_HUMAN | <u>Y</u> TAQEGAKFIKWTAPEAIHFVFTIKADVWSFGVLLMEVVTYGRVPYPG   | 438 | <b>Y389 (autophosphorylation)</b>   |
|                  |                                                            |     |                                     |
| P12931 SRC_HUMAN | MVNREVLDQVERGYRMPCCPPECPESLHD-LMCQCWRKEPEERPTFEYLQA        | 517 |                                     |
| P07947 YES_HUMAN | MVNREVLEQVERGYRMPCCPGCPESLHE-LMNLCKWKDPDERPTFEYIQS         | 524 |                                     |
| P09769 FGR_HUMAN | MNKREVLEQVEQGYHMPCCPGCPASLYE-AMEQTWRLDPEERPTFEYLQS         | 510 |                                     |
| P06241 FYN_HUMAN | MNNREVLEQVERGYRMPCCQDCPISLHE-LMIHCWKDPPEERPTFEYLQS         | 518 |                                     |
| P08631 HCK_HUMAN | MSNPEVIRALERGYRMPRENCPEELYN-IMMRCWKNRPEERPTFEYIQS          | 509 |                                     |
| P07948 LYN_HUMAN | RTNADVMTALSQGYRMPRVENCPEELYD-IMKMCWKEKAEERPTFDYLQS         | 495 |                                     |
| P06239 LCK_HUMAN | MTNPEVIQNLERGYRMPVDPNCPEELYQ-LMRLCWKERPEDRPTFDYLRS         | 492 |                                     |
| P51451 BLK_HUMAN | MSNPEVIRNLERGYRMPRPTCPPELYRGVIAECWRSRPEERPTFEFLQS          | 488 |                                     |
|                  |                                                            |     |                                     |
| P12931 SRC_HUMAN | FLEDYFTSTEPQ <u>Y</u> QPGENL                               | 536 | <b>Y530 (Phosphorulated by CSK)</b> |
| P07947 YES_HUMAN | FLEDYFTATEPQ <u>Y</u> QPGENL                               | 543 | <b>Y537 (Phosphorulated by CSK)</b> |
| P09769 FGR_HUMAN | FLEDYFTSAEPQ <u>Y</u> QPGDQT                               | 529 | <b>Y523 (Phosphorulated by CSK)</b> |
| P06241 FYN_HUMAN | FLEDYFTATEPQ <u>Y</u> QPGENL                               | 537 | <b>Y531 (Phosphorulated by CSK)</b> |
| P08631 HCK_HUMAN | VLDDFYTATESQ <u>Y</u> QQQP--                               | 526 | <b>Y522 (Phosphorulated by CSK)</b> |
| P07948 LYN_HUMAN | VLDDFYTATEGQ <u>Y</u> QQQP--                               | 512 | <b>Y508 (Phosphorulated by CSK)</b> |
| P06239 LCK_HUMAN | VLEDDFTATEGQ <u>Y</u> QQQP--                               | 509 | <b>Y505 (Phosphorulated by CSK)</b> |
| P51451 BLK_HUMAN | VLEDDFYTATERQ <u>Y</u> ELQP--                              | 505 | <b>Y501 (Phosphorulated by CSK)</b> |

Supplementary Table S1. DNA oligomers used for plasmid construction.

| Oligomer name        | Sequence (5'-3')                                                                                                                          |
|----------------------|-------------------------------------------------------------------------------------------------------------------------------------------|
| Srctide_F            | gggatccccggaattcggcgaagaaccgctgtattggagcttccggcgaaaaaaataa tcgagcgccgcgc<br>(EcoRI, <u>Srctide</u> , <u>stop codon</u> , <u>ΔXhoI</u> )   |
| Srctide_R            | gatcgcgccgctcga ttatTTTTTTTcgccggaagctcaatacagcggttcttcgccaattccggggatccc<br>( <u>ΔXhoI</u> , <u>stop codon</u> , <u>Srctide</u> , EcoRI) |
| pGEX-6P-1_EcoRI      | gaattccggggatcccaggg (EcoRI)                                                                                                              |
| pGEX-6P-1_ΔXhoI      | tcgagcgccgcgcgcgtgac (ΔXhoI)                                                                                                              |
| GST Srctide_pCDF1b_F | caagagtcggatccatgcccctatactaggta (BamHI, GST)                                                                                             |
| GSTSrctide_pCDF1b_R  | ttctttaccagactcttattTTTTTTTggcgaacg (XhoI, Srctide)                                                                                       |
| pCDF1b_BamHI         | ggatccggactctgtgctc (BamHI)                                                                                                               |
| pCDF1b_XhoI          | gagctctgtaagaacacgc (XhoI)                                                                                                                |
| pET21a_Src_F         | atgggtcgcggatccatgggtagcaacaagagc (BamHI, <u>start codon</u> )                                                                            |
| pET21a_Src_R         | gtggtggtgctcgaggaggttctccccgggctg (XhoI)                                                                                                  |
| pET21a_Fgr_F         | atgggtcgcggatccatgggctgtgtgtctgc (BamHI, <u>start codon</u> )                                                                             |
| pET21a_Fgr_R         | gtggtggtgctcgagtgctgatccccgggctg (XhoI)                                                                                                   |
| pET21a_Hck F         | atgggtcgcggatccatgggctgtgtgtctgc (BamHI, <u>start codon</u> )                                                                             |
| pET21a_Hck R         | gtggtggtgctcgagtggtgctgtgtgtgactg (XhoI)                                                                                                  |
| pET21a_Yes_F         | atgggtcgcggatccatgggctgcattaaaagt (BamHI, <u>start codon</u> )                                                                            |
| pET21a_Yes_R         | gtggtggtgctcgagtaaatttctctggctg (XhoI)                                                                                                    |
| pET21a_Blκ_F         | atgggtcgcggatccatgggctggttaagtagc (BamHI, <u>start codon</u> )                                                                            |
| pET21a_Blκ_R         | gtggtggtgctcgaggggctgcagctgtactg (XhoI)                                                                                                   |
| pET21a_Fyn_F         | atgggtcgcggatccatgggctgtgtgcaatgt (BamHI, <u>start codon</u> )                                                                            |
| pET21a_Fyn_R         | gtggtggtgctcgagcaggtttcaccaggttg (XhoI)                                                                                                   |
| pET21a_Lck_F         | atgggtcgcggatccatgggctgtgtgtgcagc (BamHI, <u>start codon</u> )                                                                            |
| pET21a_Lck_R         | gtggtggtgctcgagaggctgaggctgtactg (XhoI)                                                                                                   |
| pET21a_Lyn_F         | atgggtcgcggatccatgggatgtataaaatca (BamHI, <u>start codon</u> )                                                                            |
| pET21a_Lyn_R         | gtggtggtgctcgagaggctgctgtgtgtattg (XhoI)                                                                                                  |
| pET21a_BamHI         | ggatccgcgacccatttgct (BamHI)                                                                                                              |
| pET21a_XhoI          | ctcgagcaccaccaccacca (XhoI)                                                                                                               |
| pcDNA3.1_Src_F       | gctggatatctgcagaattcatgggtagcaacaagagcaag (EcoRI, <u>start codon</u> )                                                                    |
| pcDNA3.1_Src_R       | ttggtaccgagctcgatcctcacttatcgtcgtcatccttgtaatcagggttctccccgggctg<br>(BamHI, <u>stop codon</u> , FLAG)                                     |
| pcDNA3.1_Lck_F       | gctggatatctgcagaattcatgggctgtggctgcagctca (EcoRI, <u>start codon</u> )                                                                    |
| pcDNA3.1_Lck_R       | ttggtaccgagctcgatcctcacttatcgtcgtcatccttgtaatcagggtgaggctgtgtactg<br>(BamHI, <u>stop codon</u> , FLAG)                                    |
| pcDNA3.1_Hck_F       | gctggatatctgcagaattcatggggggcgctcaagctgc (EcoRI, <u>start codon</u> )                                                                     |
| pcDNA3.1_Hck_R       | ttggtaccgagctcgatcctcacttatcgtcgtcatccttgtaatcagggtgctgtgtgtactg                                                                          |

|                       |                                                                                                                            |
|-----------------------|----------------------------------------------------------------------------------------------------------------------------|
|                       | ( <u>BamHI</u> , <u>stop codon</u> , <u>FLAG</u> )                                                                         |
| pcDNA3.1_Black_F      | <u>gctggatattcgcagaattcatgggctggaagtagcaaa</u> ( <u>EcoRI</u> , <u>start codon</u> )                                       |
| pcDNA3.1_Black_R      | <u>ttggtagcagctcggatcctcattatcgctgcatccttgaatcgggctgcagctcgtactg</u><br>( <u>BamHI</u> , <u>stop codon</u> , <u>FLAG</u> ) |
| pcDNA3.1_BamHI        | <u>ggatccgagctcggtaccaa</u> ( <u>BamHI</u> )                                                                               |
| pcDNA3.1_EcoRI        | <u>gaattctgcagatattccagc</u> ( <u>EcoRI</u> )                                                                              |
| pHEK293_Yes_F         | <u>ctccccgggctcgaggatccatgggctgcataaaagtaaa</u> ( <u>BamHI</u> , <u>start codon</u> )                                      |
| pHEK293_Yes_R         | <u>tgctgcaggtcgactctagattactatcgctgcatccttgaatcctaaatttctcctggctg</u><br>( <u>XbaI</u> , <u>stop codon</u> , <u>FLAG</u> ) |
| pHEK293_Fyn_F         | <u>ctccccgggctcgaggatccatgggctgtgtgcaatgaag</u> ( <u>BamHI</u> , <u>start codon</u> )                                      |
| pHEK293_Fyn_R         | <u>tgctgcaggtcgactctagattactatcgctgcatccttgaatccagggtttcaccagggtg</u><br>( <u>XbaI</u> , <u>stop codon</u> , <u>FLAG</u> ) |
| pHEK293_Lyn_F         | <u>ctccccgggctcgaggatccatgggctgtataaaatcaaaa</u> ( <u>BamHI</u> , <u>start codon</u> )                                     |
| pHEK293_Lyn_R         | <u>tgctgcaggtcgactctagattactatcgctgcatccttgaatcaggctgctgctggtattg</u><br>( <u>XbaI</u> , <u>stop codon</u> , <u>FLAG</u> ) |
| pHEK293_Fgr_F         | <u>ctccccgggctcgaggatccatgggctgtgtgtctgaag</u> ( <u>BamHI</u> , <u>start codon</u> )                                       |
| pHEK293_Fgr_R         | <u>tgctgcaggtcgactctagattactatcgctgcatccttgaatcgtctgatccccgggctg</u><br>( <u>XbaI</u> , <u>stop codon</u> , <u>FLAG</u> )  |
| pHEK293_BamHI         | <u>ggatccctcgagcccgaggag</u> ( <u>BamHI</u> )                                                                              |
| pHEK293_XbaI          | <u>tctagagtcgacctgcaggca</u> ( <u>XbaI</u> )                                                                               |
| pSP64 poly(A)_Src_F   | <u>aagcttgggctgcagatgggtagcaacaagagc</u> ( <u>PstI</u> , <u>start codon</u> )                                              |
| pSP64 poly(A)_Src_R   | <u>cggggatcctctagattactatcgctgcatccttgaatcggagttctccccgggctg</u> ( <u>XbaI</u> , <u>stop codon</u> , <u>FLAG</u> )         |
| pSP64 poly(A)_Fgr_F   | <u>aagcttgggctgcagatgggctgtgtgtctgc</u> ( <u>PstI</u> , <u>start codon</u> )                                               |
| pSP64 poly(A)_Fgr_R   | <u>cggggatcctctagattactatcgctgcatccttgaatcgtctgatccccgggctg</u> ( <u>XbaI</u> , <u>stop codon</u> , <u>FLAG</u> )          |
| pSP64 poly(A)_Hck_F   | <u>aagcttgggctgcagatgaagccaagtctc</u> ( <u>PstI</u> , <u>start codon</u> )                                                 |
| pSP64 poly(A)_Hck_R   | <u>cggggatcctctagattactatcgctgcatccttgaatcggctgctgttggtactg</u> ( <u>XbaI</u> , <u>stop codon</u> , <u>FLAG</u> )          |
| pSP64 poly(A)_Yes_F   | <u>aagcttgggctgcagatgggctgcataaaagt</u> ( <u>PstI</u> , <u>start codon</u> )                                               |
| pSP64 poly(A)_Yes_R   | <u>cggggatcctctagattactatcgctgcatccttgaatcctaaatttctcctggctg</u> ( <u>XbaI</u> , <u>stop codon</u> , <u>FLAG</u> )         |
| pSP64 poly(A)_Black_F | <u>aagcttgggctgcagatgggctggaagtagc</u> ( <u>PstI</u> , <u>start codon</u> )                                                |
| pSP64 poly(A)_Black_R | <u>cggggatcctctagattactatcgctgcatccttgaatcgggctgcagctcgtactg</u> ( <u>XbaI</u> , <u>stop codon</u> , <u>FLAG</u> )         |
| pSP64 poly(A)_Fyn_F   | <u>aagcttgggctgcagatgggctgtgtgcaatgt</u> ( <u>PstI</u> , <u>start codon</u> )                                              |
| pSP64 poly(A)_Fyn_R   | <u>cggggatcctctagattactatcgctgcatccttgaatccagggtttcaccagggtg</u> ( <u>XbaI</u> , <u>stop codon</u> , <u>FLAG</u> )         |
| pSP64 poly(A)_Lck_F   | <u>aagcttgggctgcagatgggctgtggctgcagc</u> ( <u>PstI</u> , <u>start codon</u> )                                              |
| pSP64 poly(A)_Lck_R   | <u>cggggatcctctagattactatcgctgcatccttgaatcaggctgaggctggtactg</u> ( <u>XbaI</u> , <u>stop codon</u> , <u>FLAG</u> )         |
| pSP64 poly(A)_Lyn_F   | <u>aagcttgggctgcagatgggctgtataaaatca</u> ( <u>PstI</u> , <u>start codon</u> )                                              |
| pSP64 poly(A)_Lyn_R   | <u>cggggatcctctagattactatcgctgcatccttgaatcaggctgctgctggtattg</u> ( <u>XbaI</u> , <u>stop codon</u> , <u>FLAG</u> )         |
| pSP64 poly(A)_PstI    | <u>ctgcagcccaagctgtattc</u> ( <u>PstI</u> )                                                                                |
| pSP64 poly(A)_XbaI    | <u>tctagaggatccccgggcag</u> ( <u>XbaI</u> )                                                                                |
| pF25A ICE T7_Src_F    | <u>tataaagcgatcgccatgggtagcaacaagagc</u> ( <u>SgfI</u> , <u>start codon</u> )                                              |
| pF25A ICE T7_Src_R    | <u>ccgaattcgttttaaacctatcgctgcatccttgaatcggagttctccccgggctg</u> ( <u>PmeI</u> , <u>stop codon</u> , <u>FLAG</u> )          |
| pF25A ICE T7_Fgr_F    | <u>tataaagcgatcgccatgggctgtgtgtctgc</u> ( <u>SgfI</u> , <u>start codon</u> )                                               |

|                     |                                                                                        |
|---------------------|----------------------------------------------------------------------------------------|
| pF25A ICE T7_ Fgr_R | ccgaattcgtttaaaccttatcgtcgtcatccttgtaatctgtctgatccccgggctg (PmeI, stop codon,FLAG)     |
| pF25A ICE T7_Hck F  | tataaagcgatcgccatgaagtccaagttcctc (SgfI, start codon)                                  |
| pF25A ICE T7_Hck R  | ccgaattcgtttaaaccttatcgtcgtcatccttgtaatctggctgctgttggtactg (PmeI, stop codon,FLAG)     |
| pF25A ICE T7_ Yes_F | tataaagcgatcgccatgggctgcattaaaagt (SgfI, start codon)                                  |
| pF25A ICE T7_ Yes_R | ccgaattcgtttaaaccttatcgtcgtcatccttgtaatctaaatttctctggctg (PmeI, stop codon,FLAG)       |
| pF25A ICE T7_Bl k_F | tataaagcgatcgccatgggctggtaagtagc (SgfI, start codon)                                   |
| pF25A ICE T7_Bl k_R | ccgaattcgtttaaaccttatcgtcgtcatccttgtaatcgggctgcagctcgtactg (PmeI, stop codon,FLAG)     |
| pF25A ICE T7_ Fyn_F | tataaagcgatcgccatgggctgtgtgcaatgt (SgfI, start codon)                                  |
| pF25A ICE T7_ Fyn_R | ccgaattcgtttaaaccttatcgtcgtcatccttgtaatccagggtttaccagggtg (PmeI, stop codon,FLAG)      |
| pF25A ICE T7_ Lck_F | tataaagcgatcgccatgggctgtggctgcagc (SgfI, start codon)                                  |
| pF25A ICE T7_ Lck_R | ccgaattcgtttaaaccttatcgtcgtcatccttgtaatcaggctgaggctggtactg (PmeI, stop codon,FLAG)     |
| pF25A ICE T7_ Lyn_F | tataaagcgatcgccatgggatataaaatca(SgfI, start codon)                                     |
| pF25A ICE T7_ Lyn_R | ccgaattcgtttaaaccttatcgtcgtcatccttgtaatcaggctgctgctgtattg (PmeI, stop codon,FLAG)      |
| pF25A ICE T7_ PstI  | ggcgatcgctttatatttttt (SgfI)                                                           |
| pF25A ICE T7_XbaI   | gtttaacgaattcgggctcggt (PmeI)                                                          |
| pFQE30_ Src_F       | caccatcacggatccatgggtagcaacaagagc(BamHI, start codon)                                  |
| pFQE30_ Src_R       | cagctaattaagcttttacttatcgtcgtcatccttgtaatcagggttctccccgggctg(HindIII, stop codon,FLAG) |
| pFQE30_ Fgr_F       | caccatcacggatccatgggctgtgtgttctgc(BamHI, start codon)                                  |
| pFQE30_ Fgr_R       | cagctaattaagcttttacttatcgtcgtcatccttgtaatctgtctgatccccgggctg(HindIII, stop codon,FLAG) |
| pFQE30_Hck F        | caccatcacggatccatgaagtccaagttcctc(BamHI, start codon)                                  |
| pFQE30_Hck R        | cagctaattaagcttttacttatcgtcgtcatccttgtaatcggctgctgttggtactg(HindIII, stop codon,FLAG)  |
| pFQE30_ Yes_F       | caccatcacggatccatgggctgcattaaaagt(BamHI, start codon)                                  |
| pFQE30_ Yes_R       | cagctaattaagcttttacttatcgtcgtcatccttgtaatctaaatttctctggctg(HindIII, stop codon,FLAG)   |
| pFQE30_Bl k_F       | caccatcacggatccatgggctggtaagtagc(BamHI, start codon)                                   |
| pFQE30_Bl k_R       | cagctaattaagcttttacttatcgtcgtcatccttgtaatcgggctgcagctcgtactg(HindIII, stop codon,FLAG) |
| pFQE30_ Fyn_F       | caccatcacggatccatgggctgtgtgcaatgt(BamHI, start codon)                                  |
| pFQE30_ Fyn_R       | cagctaattaagcttttacttatcgtcgtcatccttgtaatccagggtttaccagggtg(HindIII, stop codon,FLAG)  |
| pFQE30_ Lck_F       | caccatcacggatccatgggctgtggctgcagc(BamHI, start codon)                                  |
| pFQE30_ Lck_R       | cagctaattaagcttttacttatcgtcgtcatccttgtaatcaggctgaggctggtactg(HindIII, stop codon,FLAG) |
| pFQE30_ Lyn_F       | caccatcacggatccatgggatataaaatca(BamHI, start codon)                                    |
| pFQE30_ Lyn_R       | cagctaattaagcttttacttatcgtcgtcatccttgtaatcaggctgctgctgtattg(HindIII, stop codon,FLAG)  |
| pFQE30_ BamHI       | ggatccgtgatggtgatggtg (BamHI)                                                          |
| pFQE30_HindIII      | aagcttaattagctgagcttg (HindIII)                                                        |
| Src_Y419F_F         | attgaagacaatgagttcacggcgcggaaggt                                                       |
| Src_Y419F_R         | accttgccgcgcgtgaactcattgtcttcaat                                                       |
| Fgr_Y412_F          | atcaaggacgatgagttcaaccctgccaaggt                                                       |
| Fgr_Y412_R          | acctggcaggggttgaactcatcgtccttgat                                                       |
| Hck_Y411F_F         | attgaggacaacgagttcacggctcggaagg                                                        |
| Hck_Y411F_R         | ccctcccgagccgtgaactcgtgttctcaat                                                        |
| Yes_Y426F_F         | attgaagacaatgaattcacagcaagacaaggt                                                      |
| Yes_Y426F_R         | acctgtctgtgtgaattcattgtcttcaat                                                         |
| Blk_Y389F_F         | atcatcgacagtgaattcacggccaagagggg                                                       |

---

|             |                                   |
|-------------|-----------------------------------|
| Blk_Y389F_R | cccctcttgggccgtgaattcactgtcgatgat |
| Fyn_Y365F_F | atagaagacaatgagttcacagcaagacaaggt |
| Fyn_Y365F_R | accttgcttgcctgtgaactcattgtcttctat |
| Lck_Y424F_F | attgaggacaacgagttcacagccaggaggagg |
| Lck_Y424F_R | cccctccctggctgtgaactcgttgcctcaat  |
| Lyn_Y397F_F | attgaagataatgagttcacagcaagggaagg  |
| Lyn_Y397F_R | ccttccttgctgtgaactcattatcttcaat   |

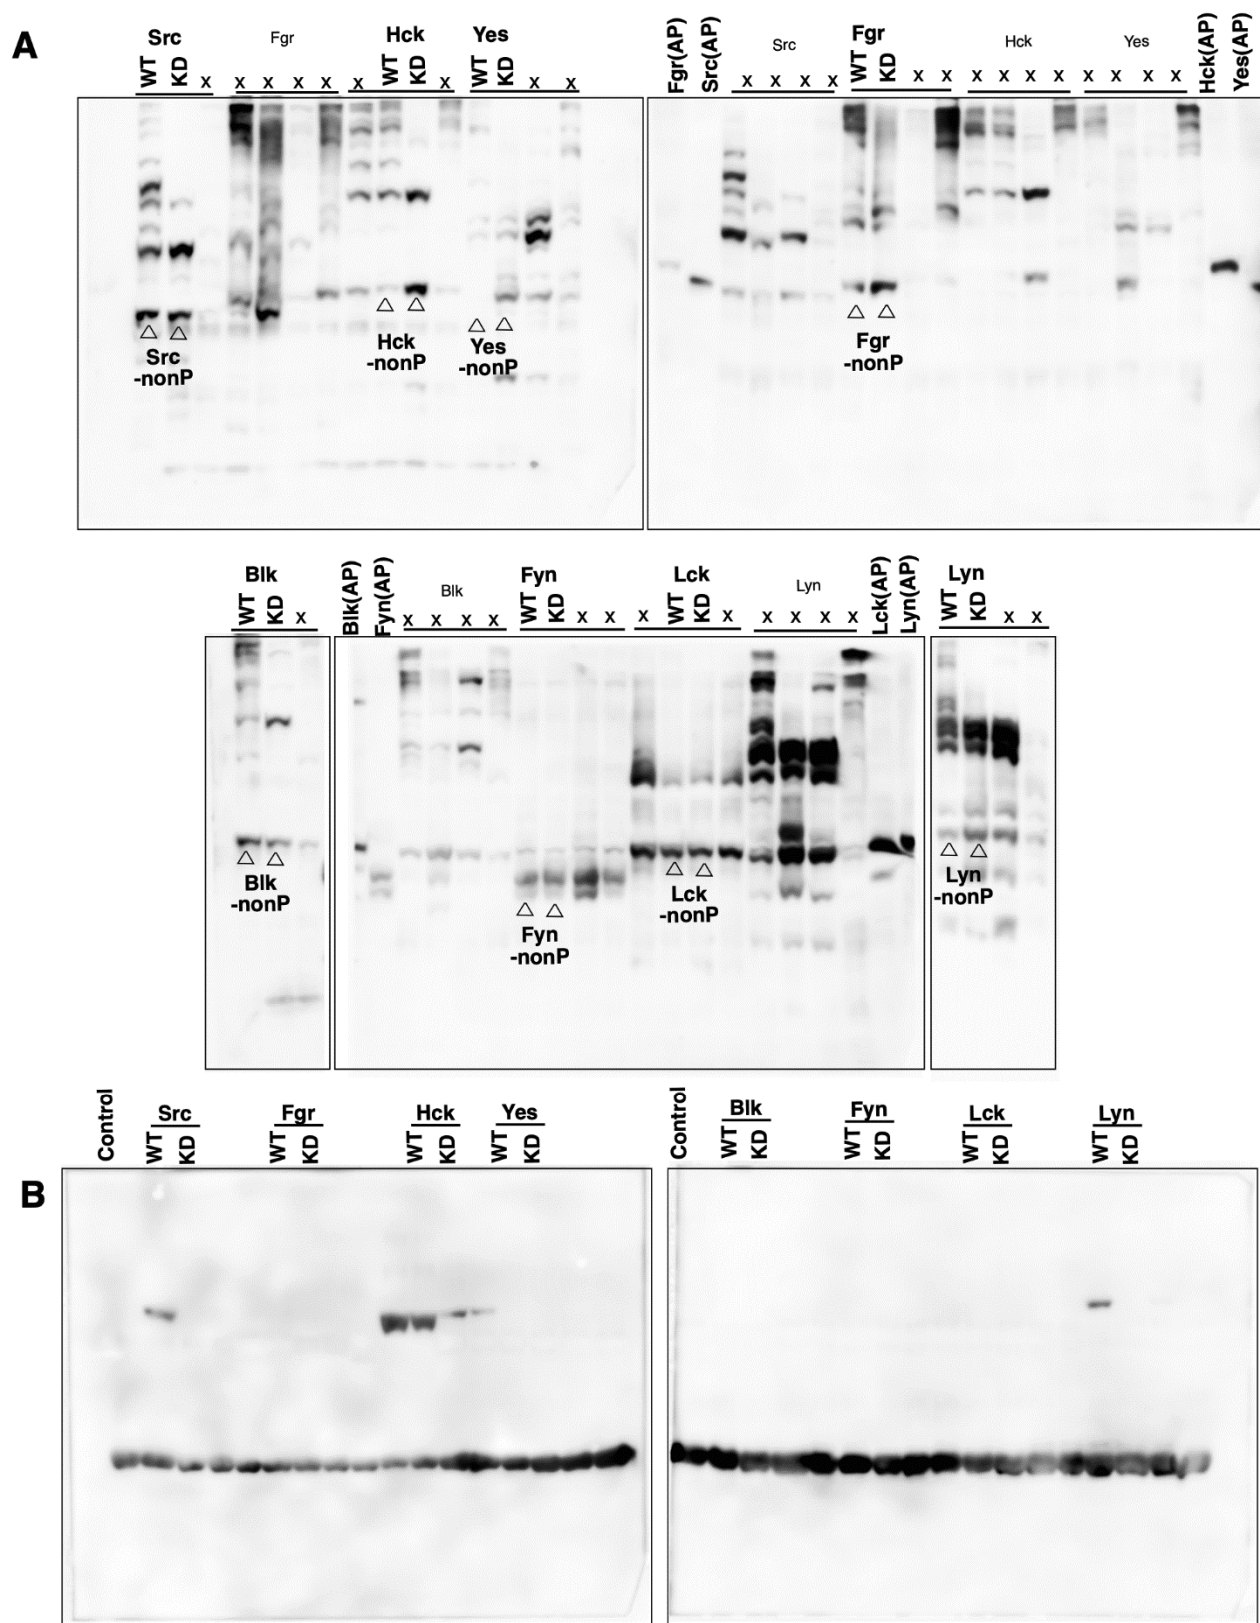

**Supplementary Figure S1.** Raw images used for Fig. 2. The band position of the unphosphorylated form of the kinase was assigned by the banding pattern of alkaline phosphatase (AP)-treated lysates shown in Fig. S1A. For AP treatment, 293 cells expressing the kinase were lysed with cell lysis buffer [50 mM Tris-HCl (pH8.0), 150 mM NaCl, 0.5%(w/v) sodium deoxycholate, 1.0%(v/v) Nonidet P40] and the soluble fraction of the lysate was incubated with AP in 50 mM Tris-HCl (pH 9.0) and 1 mM MgCl<sub>2</sub> for 3 h at 37 °C. The reactions were terminated by adding a half volume of sample-loading buffer for SDS-PAGE, consisting of 195 mM Tris-HCl (pH 6.8), 3.0% w/v SDS, 30% v/v glycerol, 15% v/v 2-sulfanylethanol, and 0.10% w/v bromophenol blue.

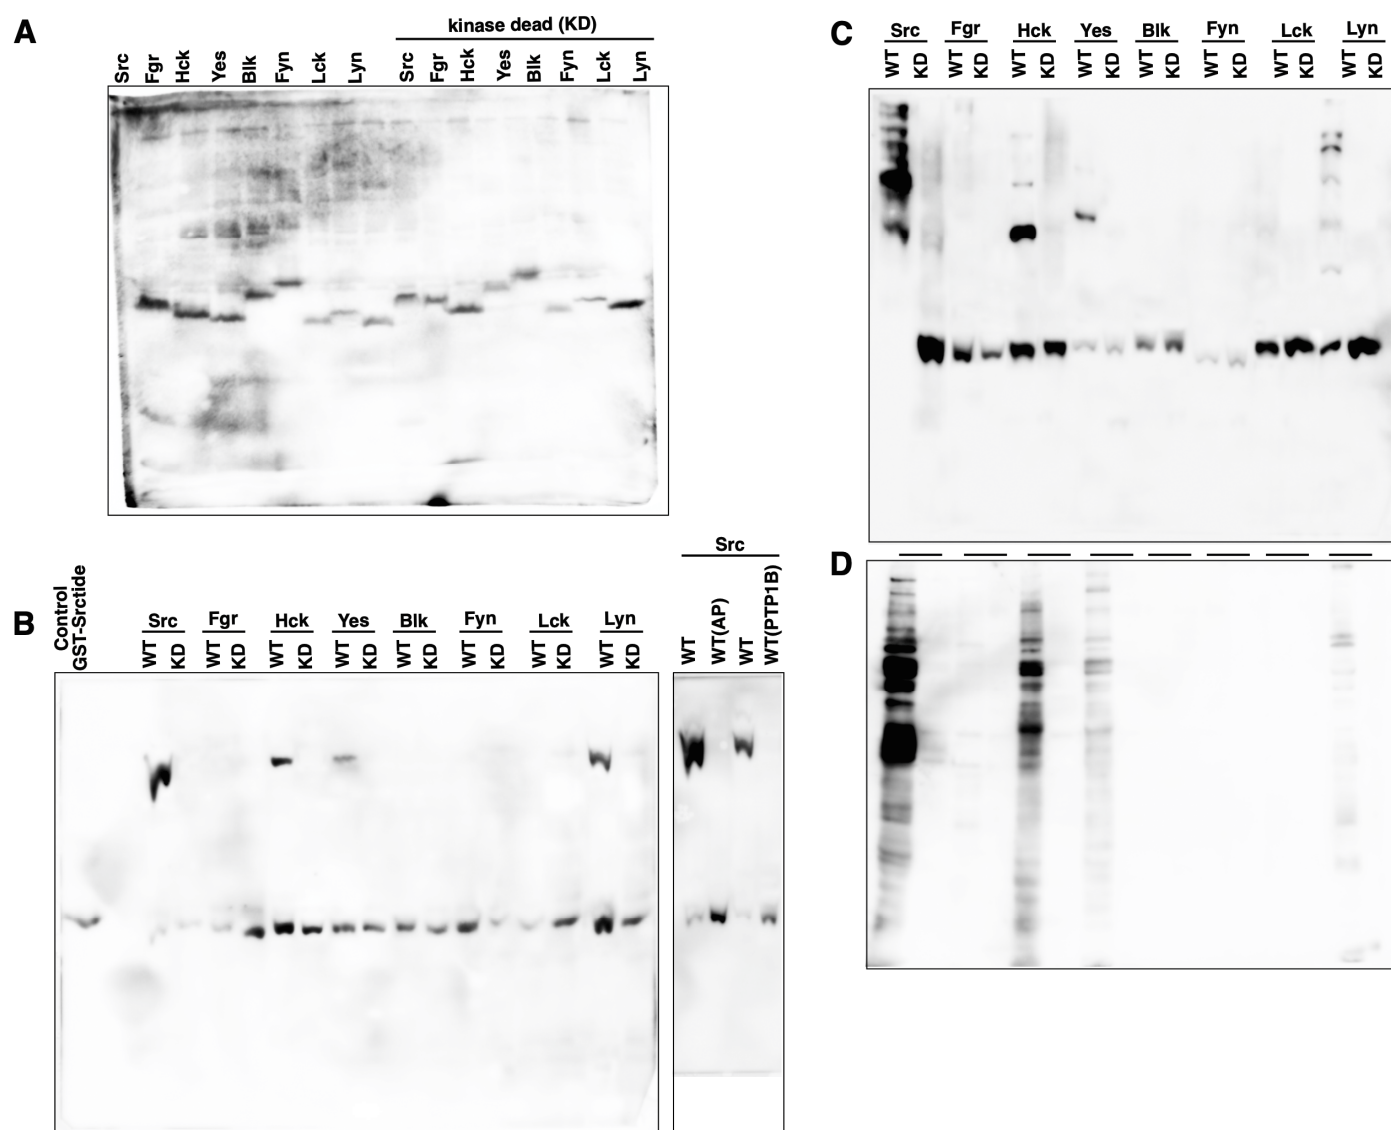

**Supplementary Figure S2.** Raw images used for Fig. 3. The right panel of Fig. S2B shows alkaline phosphatase (AP) and tyrosine phosphatase (PTP 1B) assays of the Src-expressed lysate. For the AP assay, the lysate was incubated with AP in 50 mM Tris-HCl (pH 9.0) and 1 mM MgCl<sub>2</sub> for 3 h at 37 °C. For the PTP 1B assay, the lysate was incubated with PTP1B in 10 mM Tris-HCl (pH 8.0) and 50 mM NaCl, 1 mM dithiothreitol, and 1 mM MnCl<sub>2</sub> for 3 h at 37 °C. The reactions were terminated by adding a half volume of sample-loading buffer for SDS-PAGE, consisting of 195 mM Tris-HCl (pH 6.8), 3.0% w/v SDS, 30% v/v glycerol, 15% v/v 2-sulfanylethanol, and 0.10% w/v bromophenol blue. The reactions were analyzed by Phos-tag SDS-PAGE (10% w/v polyacrylamide, 20 μM Zn<sup>2+</sup>-Phos-tag), followed by Western blotting with anti-GST antibody.



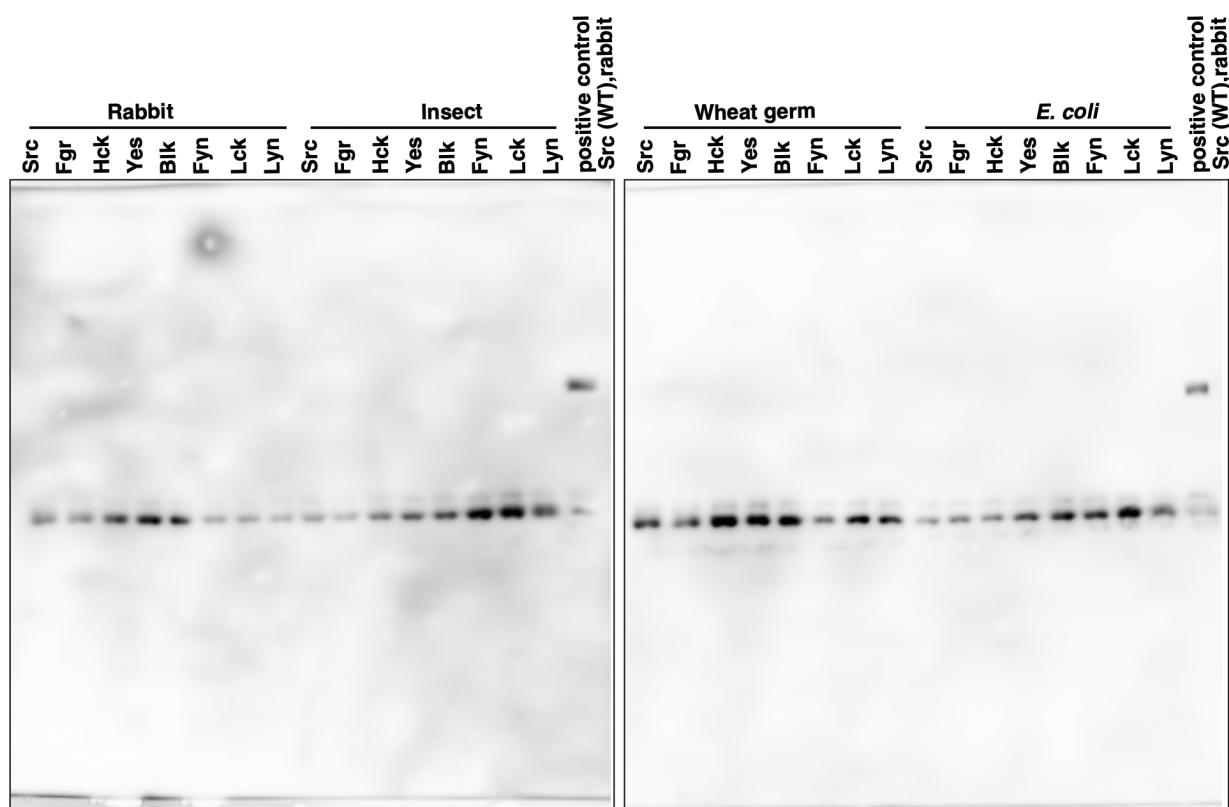

**Supplementary Figure S3.** In vitro GST-Srcptide phosphorylation assay of kinase-dead mutant of SFKs. Kinase-dead mutant of each SFK expressed by each cell-free protein expression system was purified by immunoprecipitation with anti-FLAG antibody-bound magnetic beads and then subjected to in vitro GST-Srcptide phosphorylation assay. Reactions were applied to Phos-tag SDS-PAGE gels (10% w/v polyacrylamide, 20  $\mu$ M  $Zn^{2+}$ -Phos-tag). The gels were analyzed by Western blotting with anti-GST antibody.

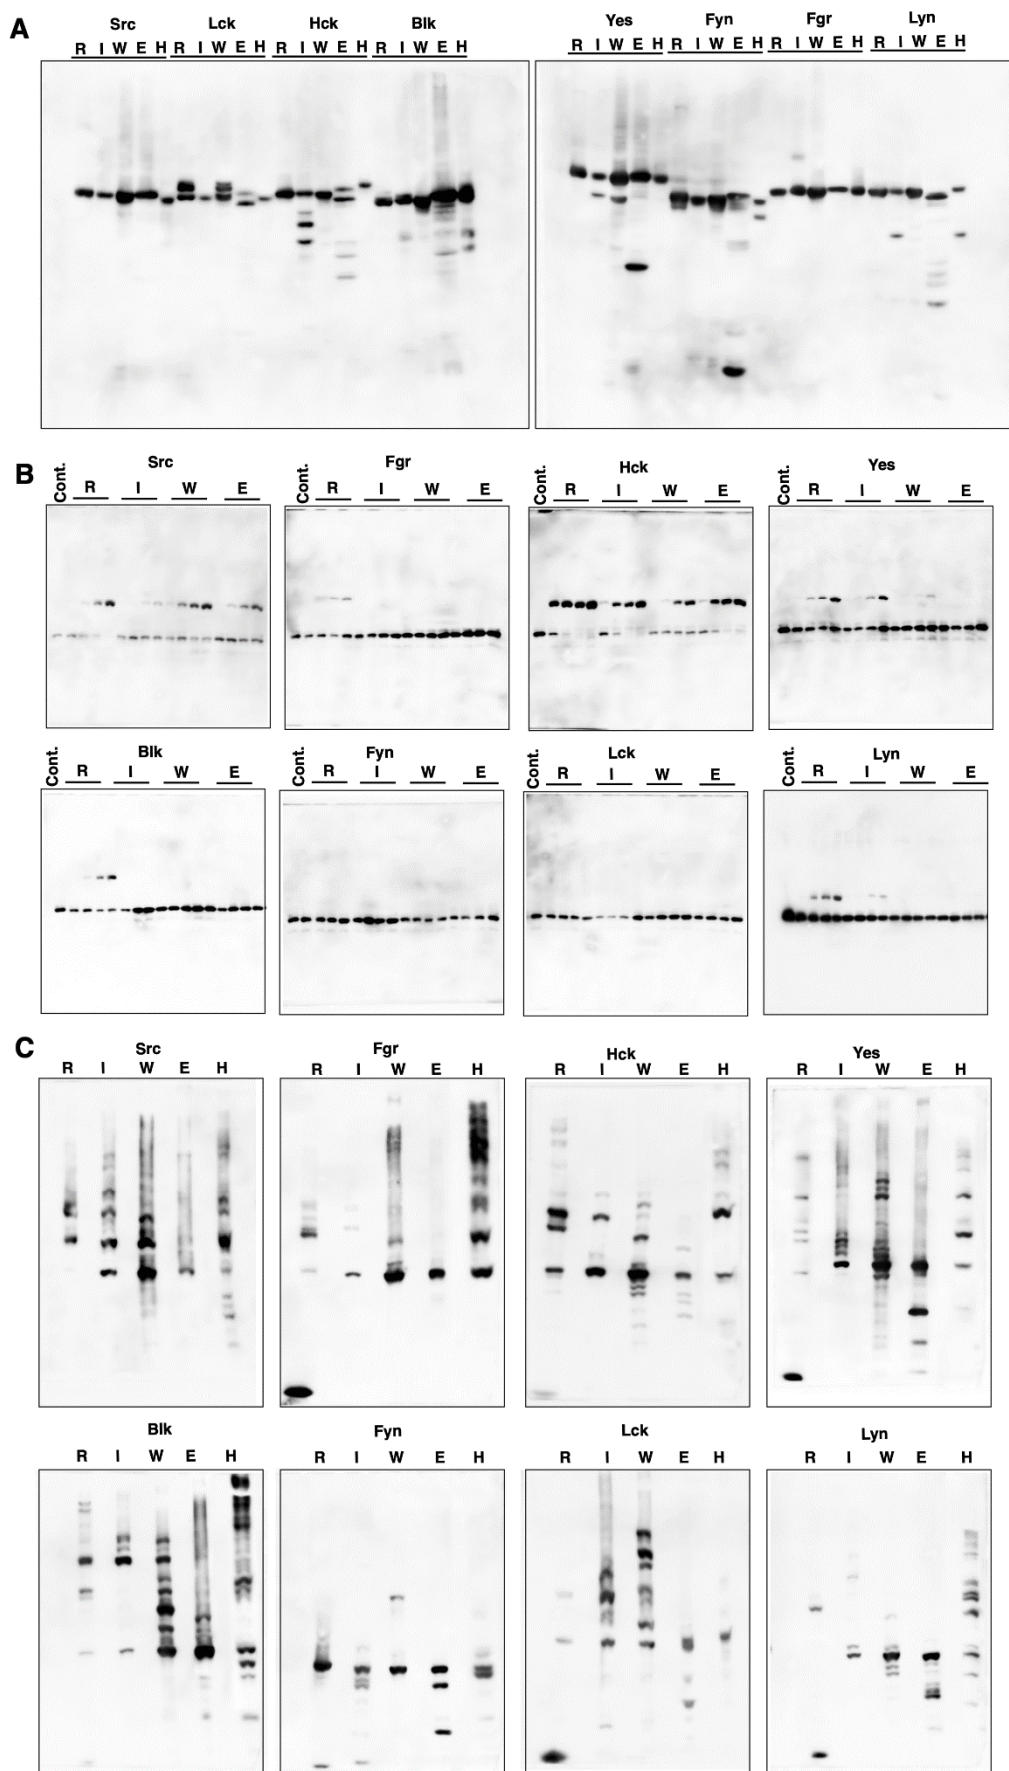

Supplementary Figure S4. Raw images used for Fig. 4.

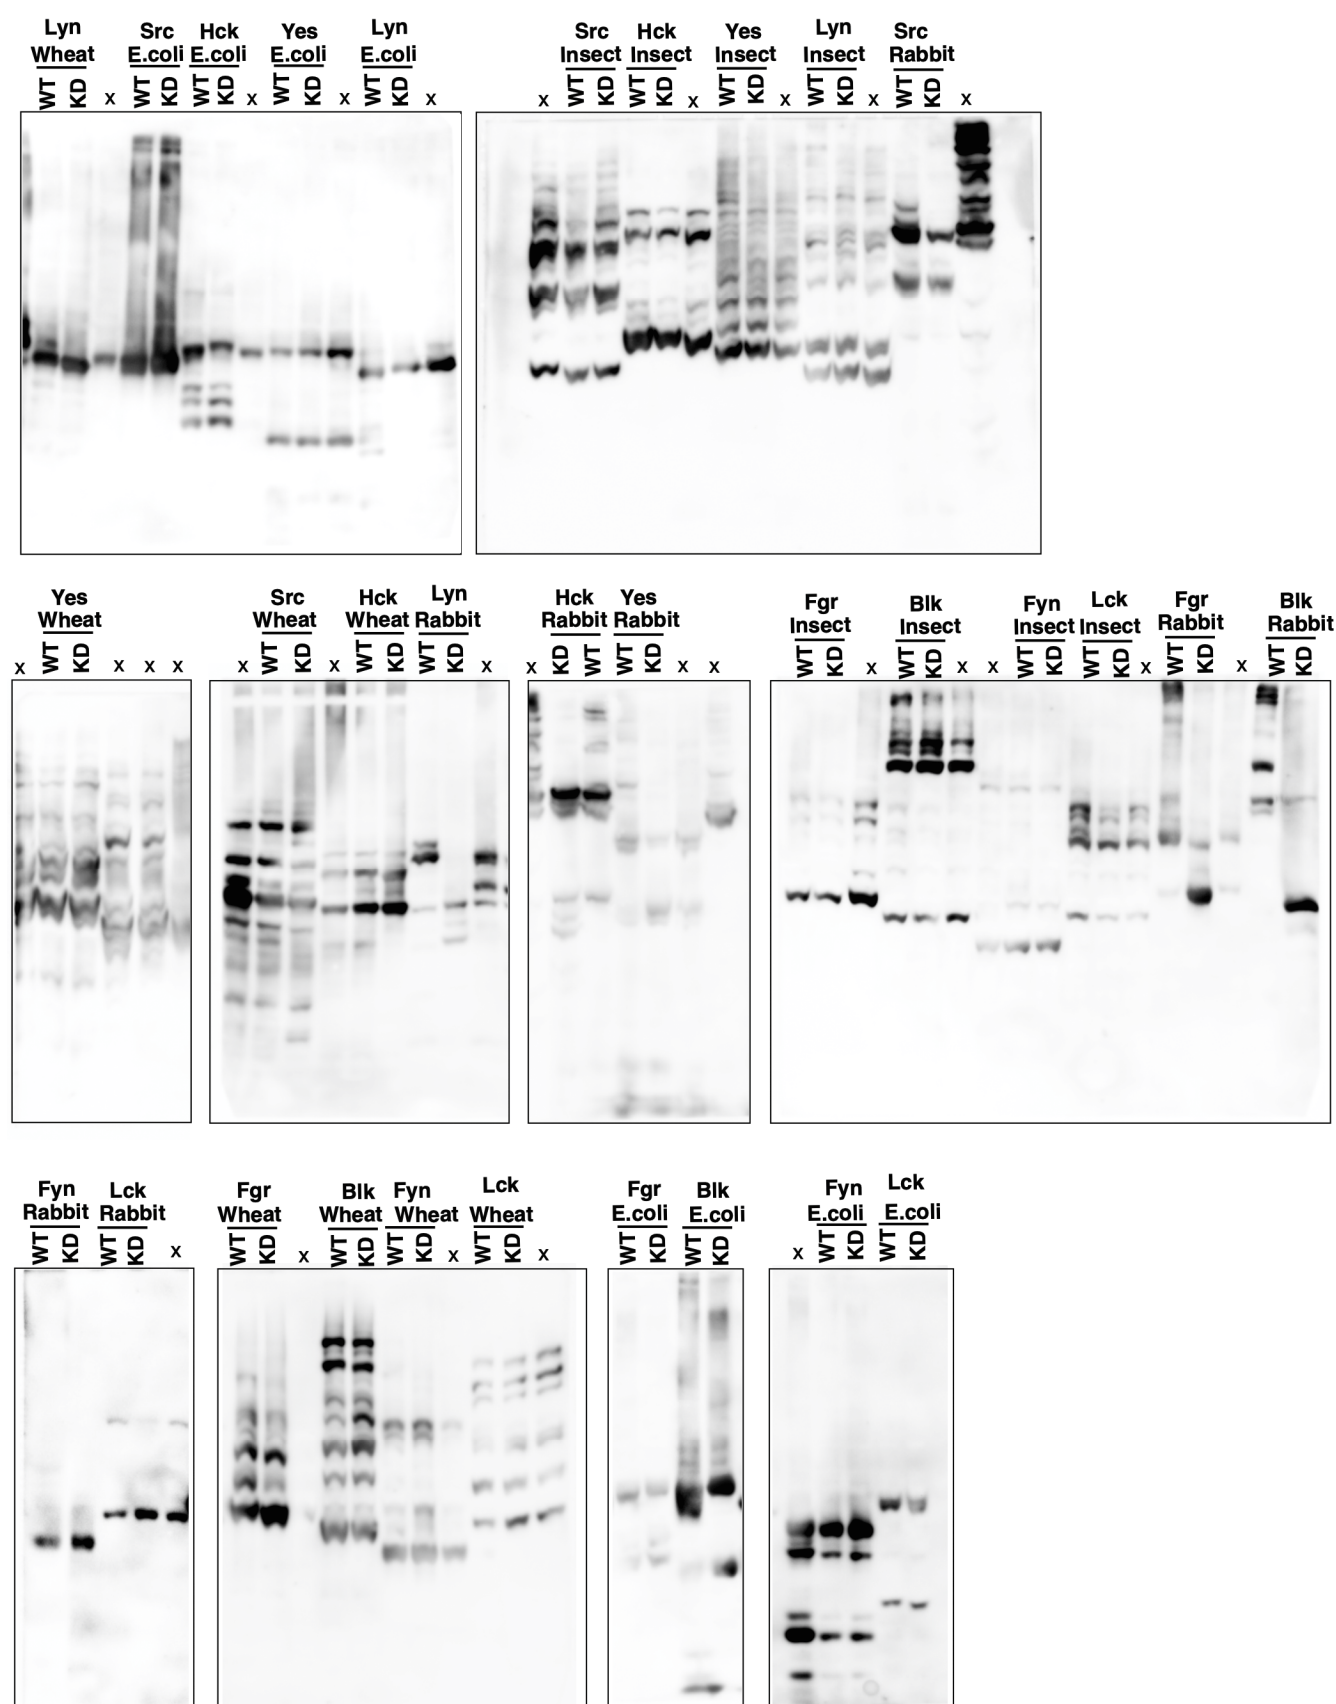

Supplementary Figure S5. Raw images used for Fig. 5.



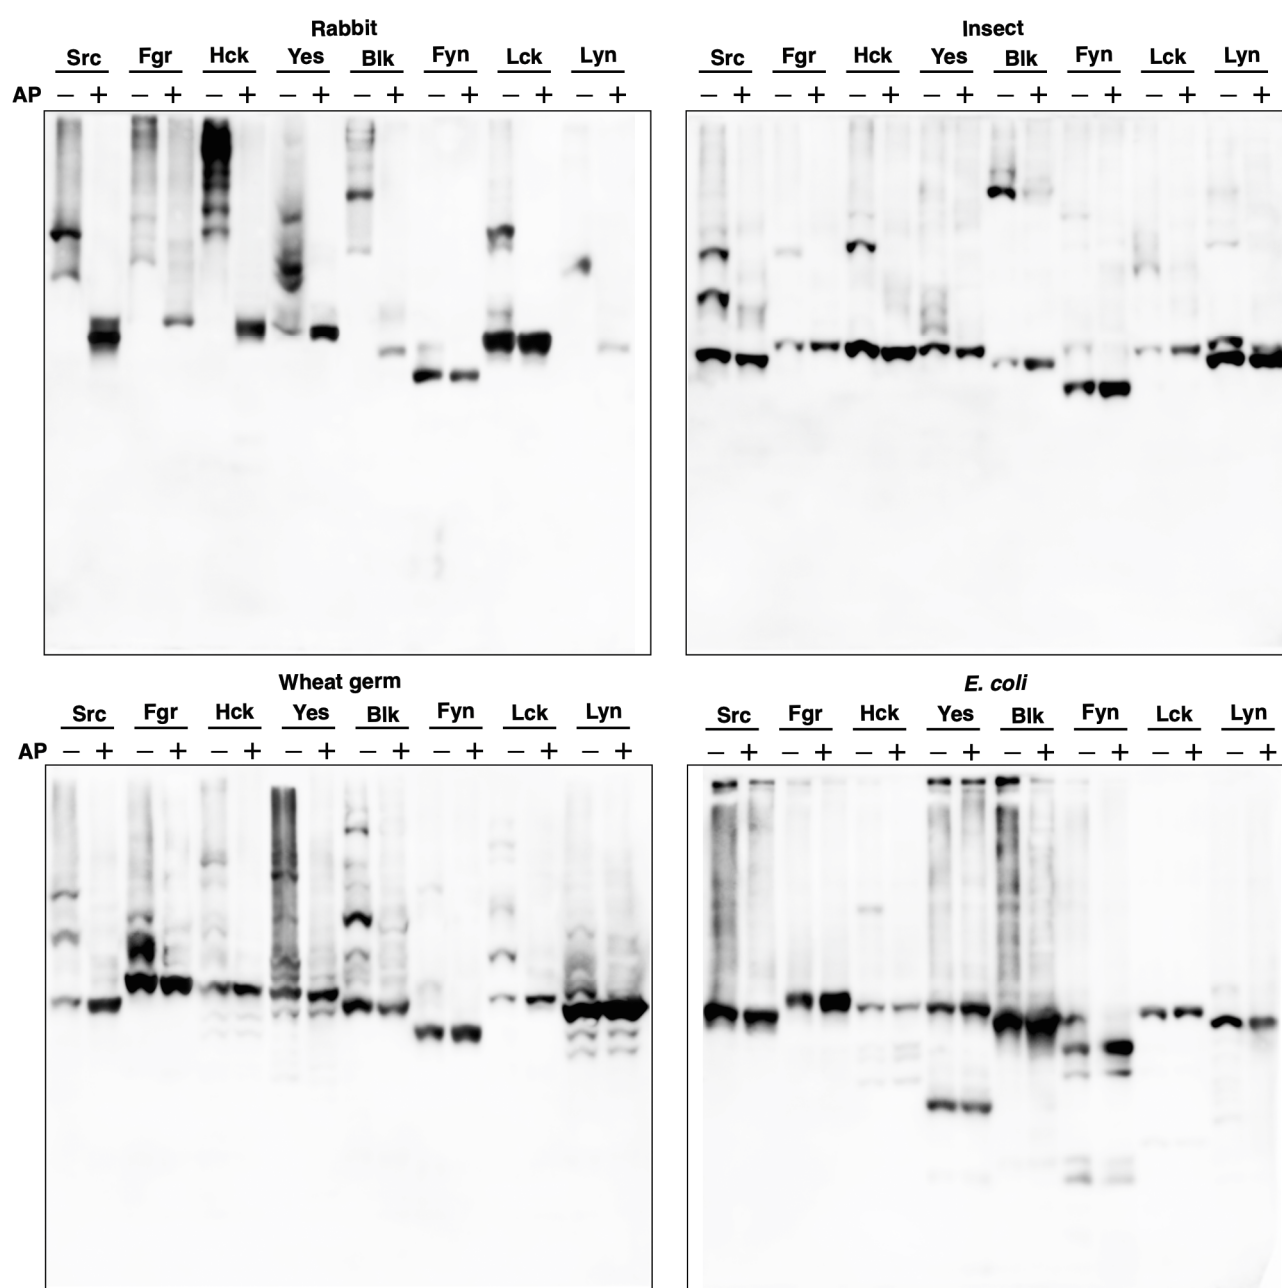

**Supplementary Figure S6.** Alkaline phosphatase (AP) assay of SFKs expressed by four types of cell-free expression systems; TnT SP6 Quick Coupled Transcription/Translation System (rabbit reticulocyte lysate system), TnT T7 Insect Cell Extract Protein Expression System, TnT SP6 High-Yield Wheat Germ Protein Expression System, S30 T7 High-Yield Protein Expression System (*E. coli* lysate system). For the AP assay, the protein expression reaction solution was incubated with AP in 50 mM Tris-HCl (pH 9.0) and 1 mM MgCl<sub>2</sub> for 3 h at 37 °C. The reactions were terminated by adding a half volume of sample-loading buffer for SDS-PAGE, consisting of 195 mM Tris-HCl (pH 6.8), 3.0% w/v SDS, 30% v/v glycerol, 15% v/v 2-sulfanylethanol, and 0.10% w/v bromophenol blue. The reactions were analyzed by Phos-tag SDS-PAGE (7% w/v polyacrylamide, 20 μM Zn<sup>2+</sup>-Phos-tag), followed by Western blotting with anti-FLAG antibody.
